# Supplementary material for: Biomolecular Fluorescence Complementation Profiling and Artificial Intelligence Structure Prediction of the Kaposi’s Sarcoma-Associated Herpesvirus ORF18 and ORF30 Interaction
Source: MDPI journal article supplement (doi:10.3390/ijms23179647), 2022-08-25
Supplement: s1 [file s1]

# Supplemental Figure S1

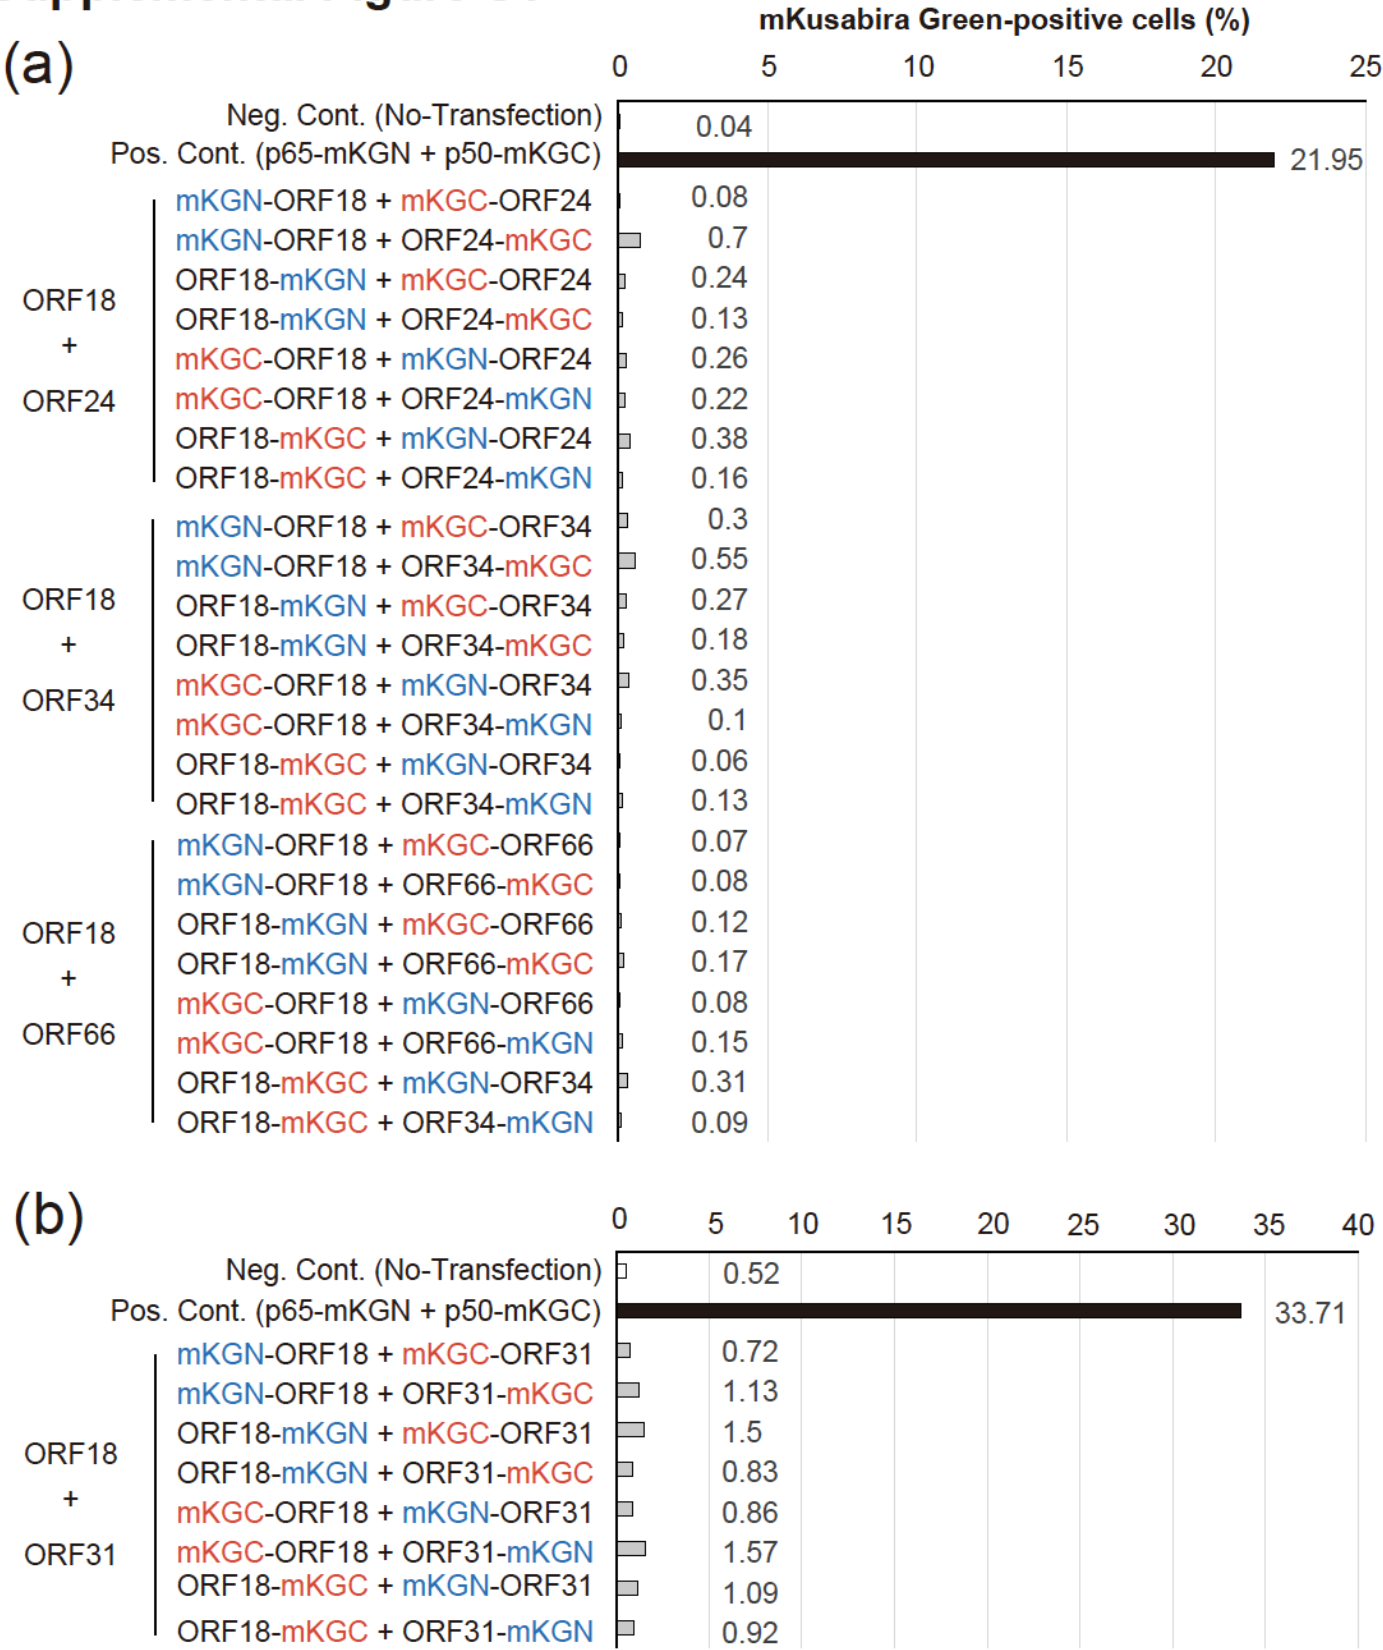

**Supplemental Figure S1.**

(a and b) Screening and optimization of the BiFC assay to determine vPIC component interactions.

Each indicated combination of the expression plasmids were co-transfected into 293T cells by the calcium phosphate method and single samples were assessed by flow cytometry.

The negative control (Neg. Cont.) consisted of non-transfected cells, and the positive control (Pos. Cont.) comprised cells co-transfected with p65-mKGN (pCONT-1) and p50-mKGC (pCONT-2) expression plasmids.

# Supplemental Figure S2

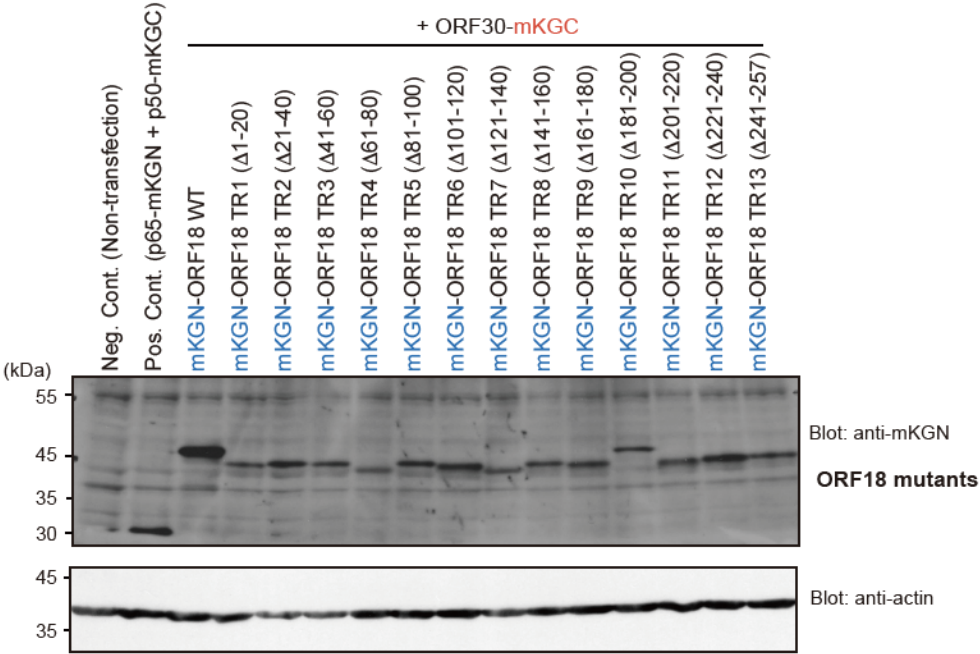

## Supplemental Figure S2.

Confirmation of ORF18 truncated mutant protein expression.

Each indicated combination of the expression plasmids were simultaneously and independently co-transfected in order to conduct a BiFC assay (as described in Fig. 2) and a Western blot (described here). The co-transfected cells were lysed and subjected to Western blotting using anti-mKGN primary antibodies. An antibody that recognizes actin (anti-actin) was used as a loading control. The original blotting data are shown in Supplemental Figure S5.

# Supplemental Figure S3

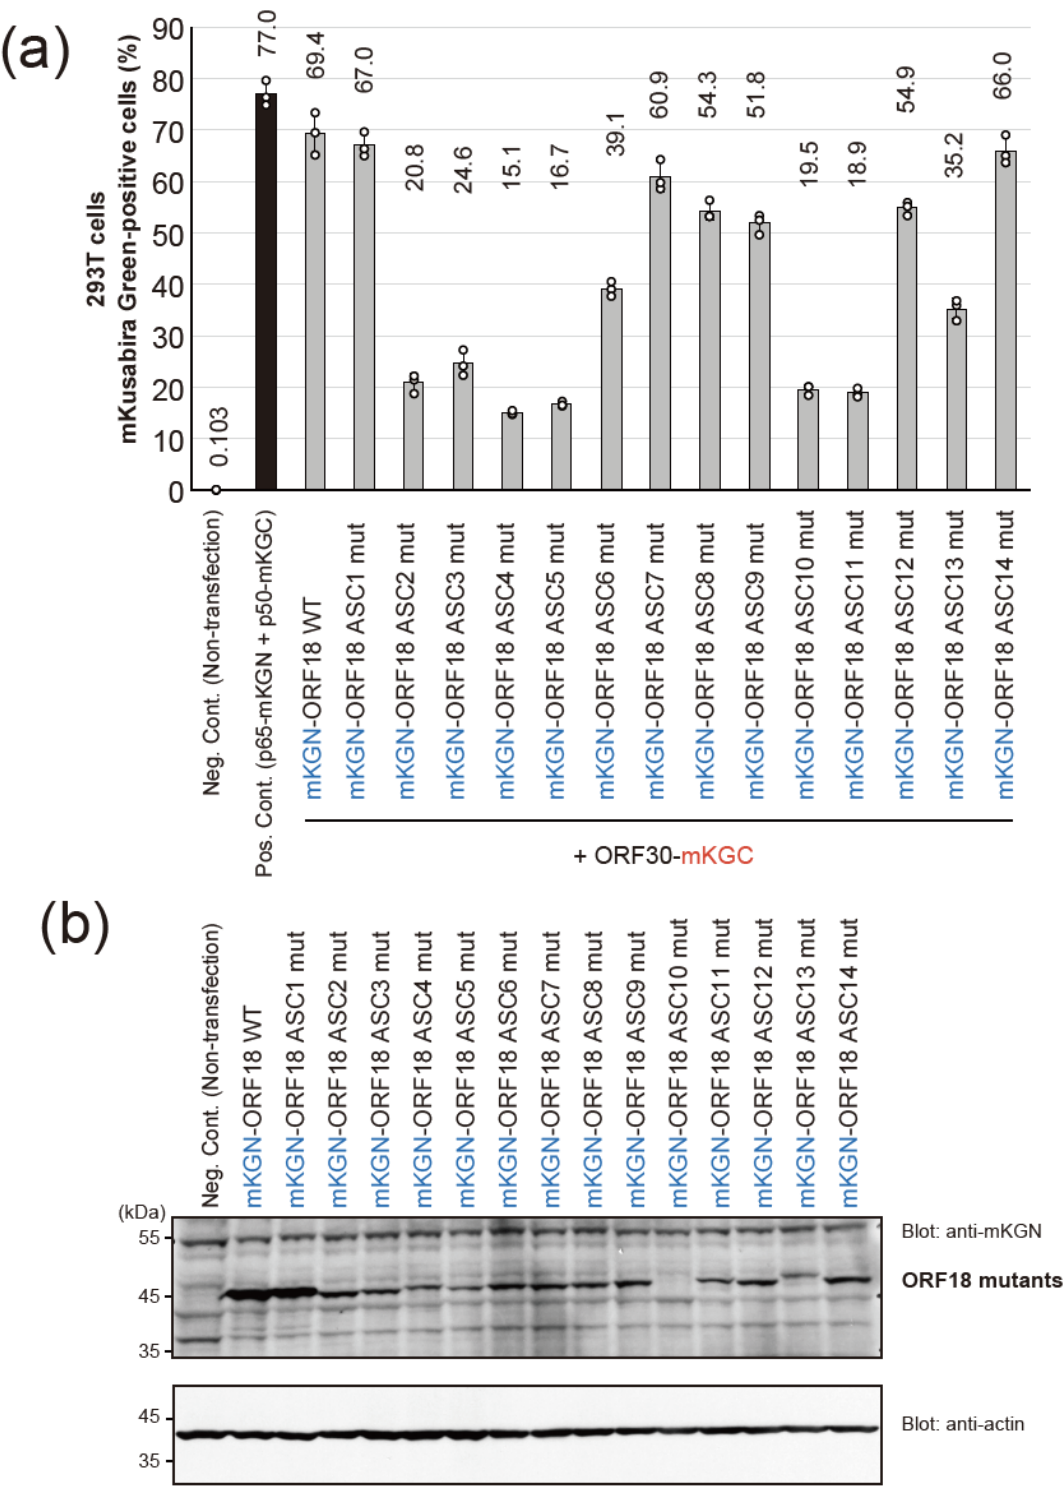

Supplemental Figure S3.

(a) BiFC assay of ORF18 block alanine-scanning mutants (ASC1mut-ASC14mut). Each mKGN-ORF18 block alanine-scanning mutant expression plasmid was co-transfected into 293T cells with ORF30-mKGC. The 293T cells were transfected with a lipofection method and three independent samples were assessed by flow cytometry. The negative control (Neg. Cont.) was non-transfected cells and the positive control (Pos. Cont.) comprised cells co-transfected with p65-mKGN (pCONT-1) and p50-mKGC (pCONT-2). Each bar and error bar indicate the average and standard deviation, respectively.

(b) Protein expression of each ORF18 block alanine-scanning mutant (ASC1mut-ASC14mut). Each mKGN-ORF18 block alanine-scanning mutant expression plasmid was co-transfected into 293T cells with ORF30-mKGC. The samples were subjected to Western blotting using anti-mKGN primary antibody. An antibody that recognizes actin (anti-actin) was used as a loading control. The original blotting data are shown in Supplemental Figure S5.

# Supplemental Figure S4

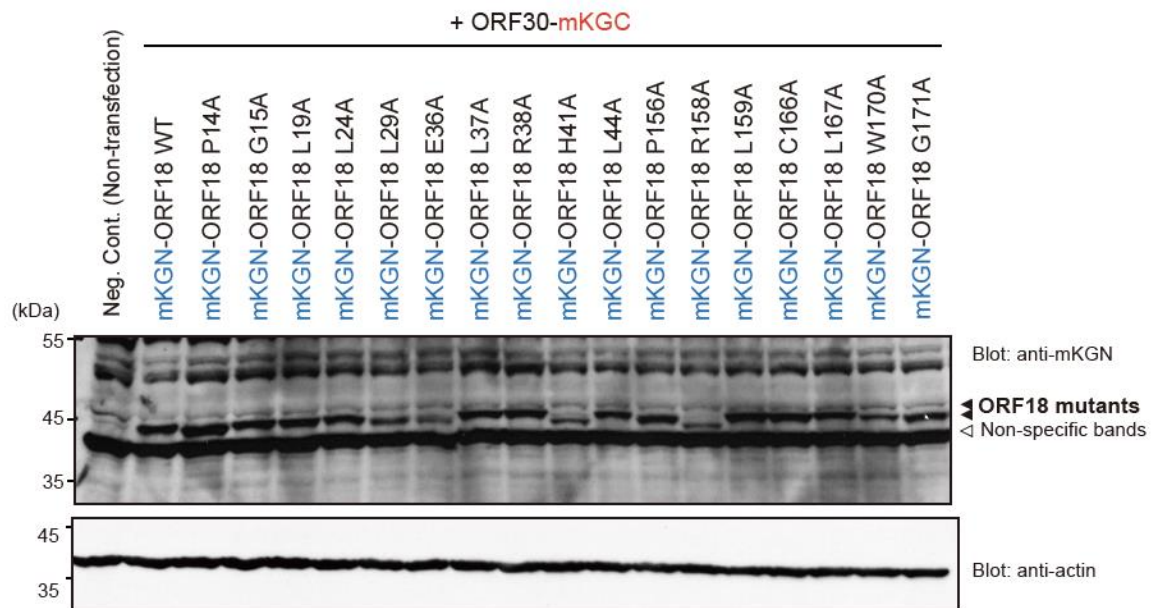

## Supplemental Figure S4.

S4. Protein expression of each ORF18 single alanine mutant. Each indicated combination of the expression plasmids were simultaneously and independently co-transfected in order to conduct a BiFC assay (as described in Fig. 4b) and a Western blot (described here). The cells were lysed and subjected to Western blotting using anti-mKGN primary antibodies. An antibody that recognizes actin (anti-actin) was used as a loading control. The original blotting data are shown in Supplemental Figure S5.

# Supplemental Figure S5

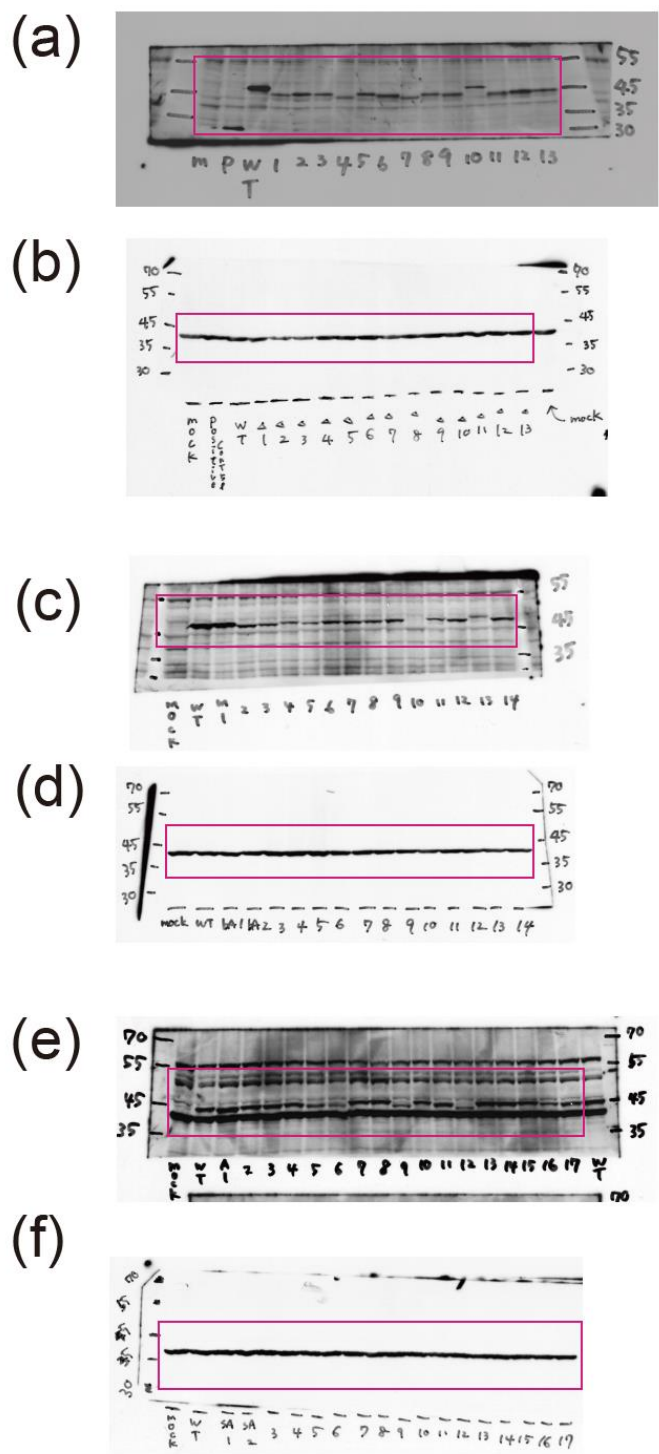

## Supplemental Figure S5

Original Western blotting data (X-ray film) of Supplemental Figure S2, S3, and S4.

(a) Original anti-mKGN blotting data of Supplemental Figure S2 upper panel.

(b) Original anti-actin blotting data of Supplemental Figure S2 lower panel.

(c) Original anti-mKGN blotting data of Supplemental Figure S3b upper panel.

(d) Original anti-actin blotting data of Supplemental Figure S3b lower panel.

(e) Original anti-mKGN blotting data of Supplemental Figure S4 upper panel.

(f) Original anti-actin blotting data of Supplemental Figure S4 lower panel.



Supplemental Figure S6

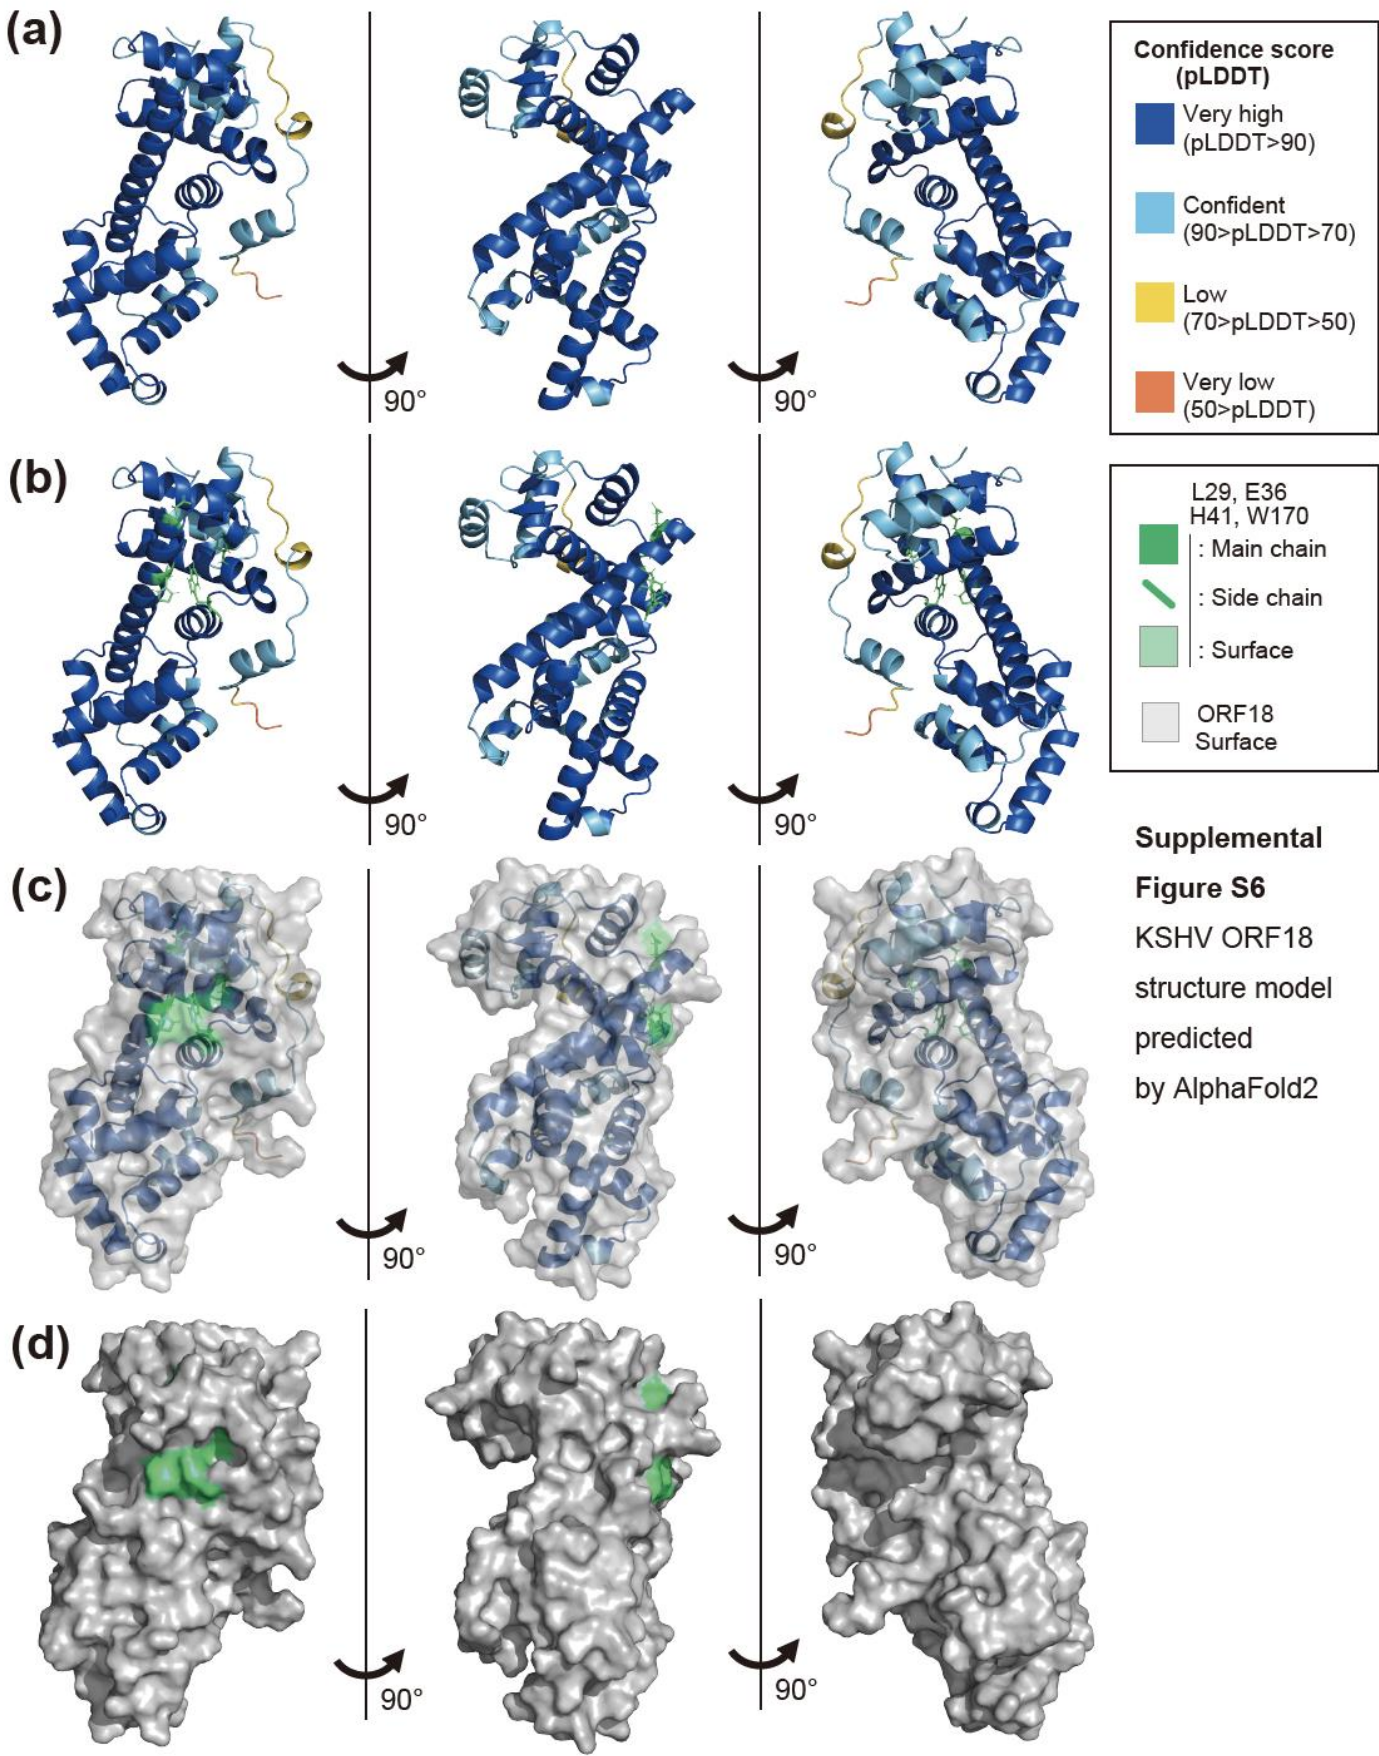

# Supplemental Figure S7

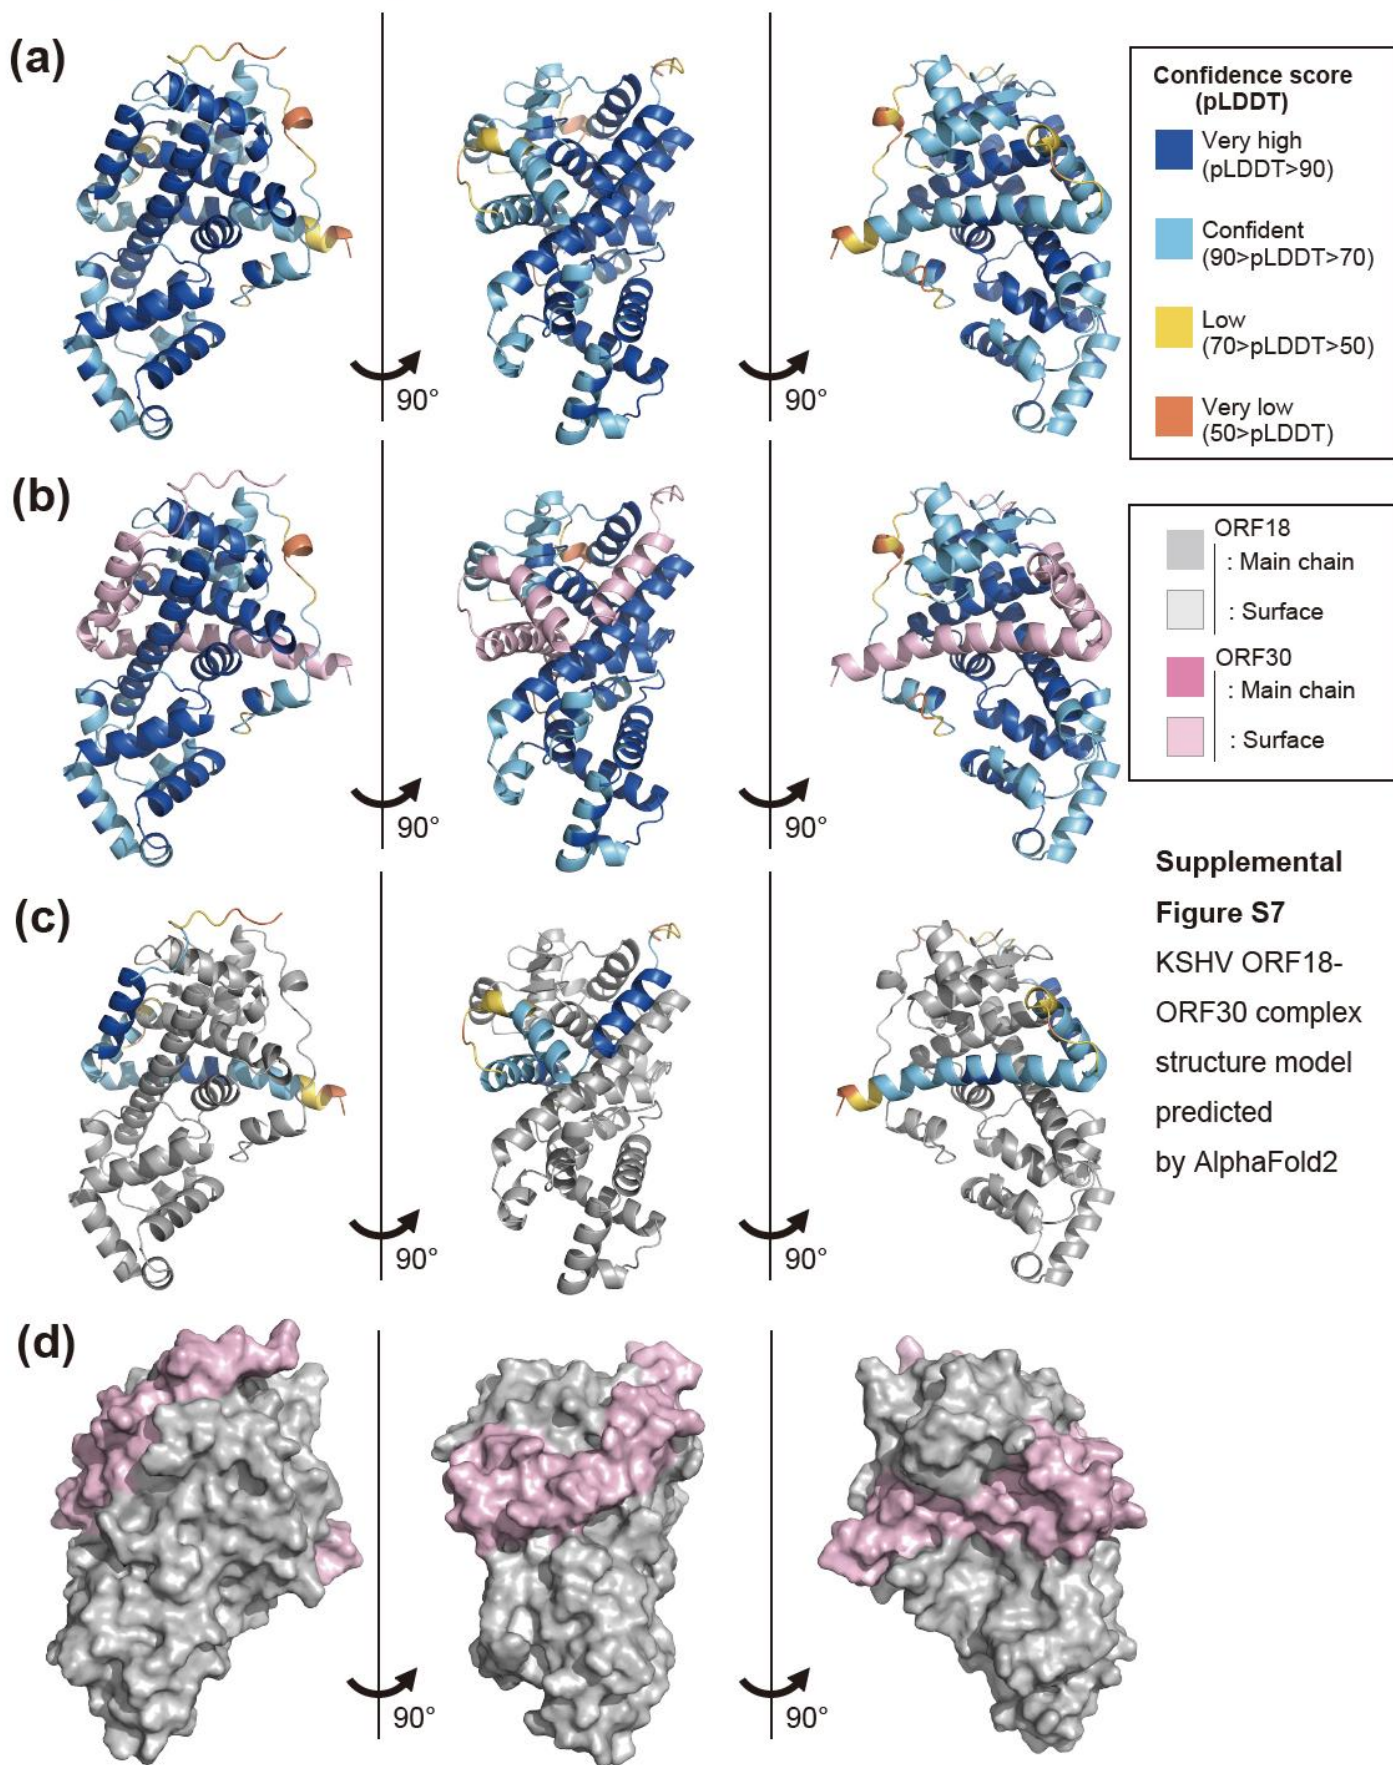



# Supplemental Figure S8

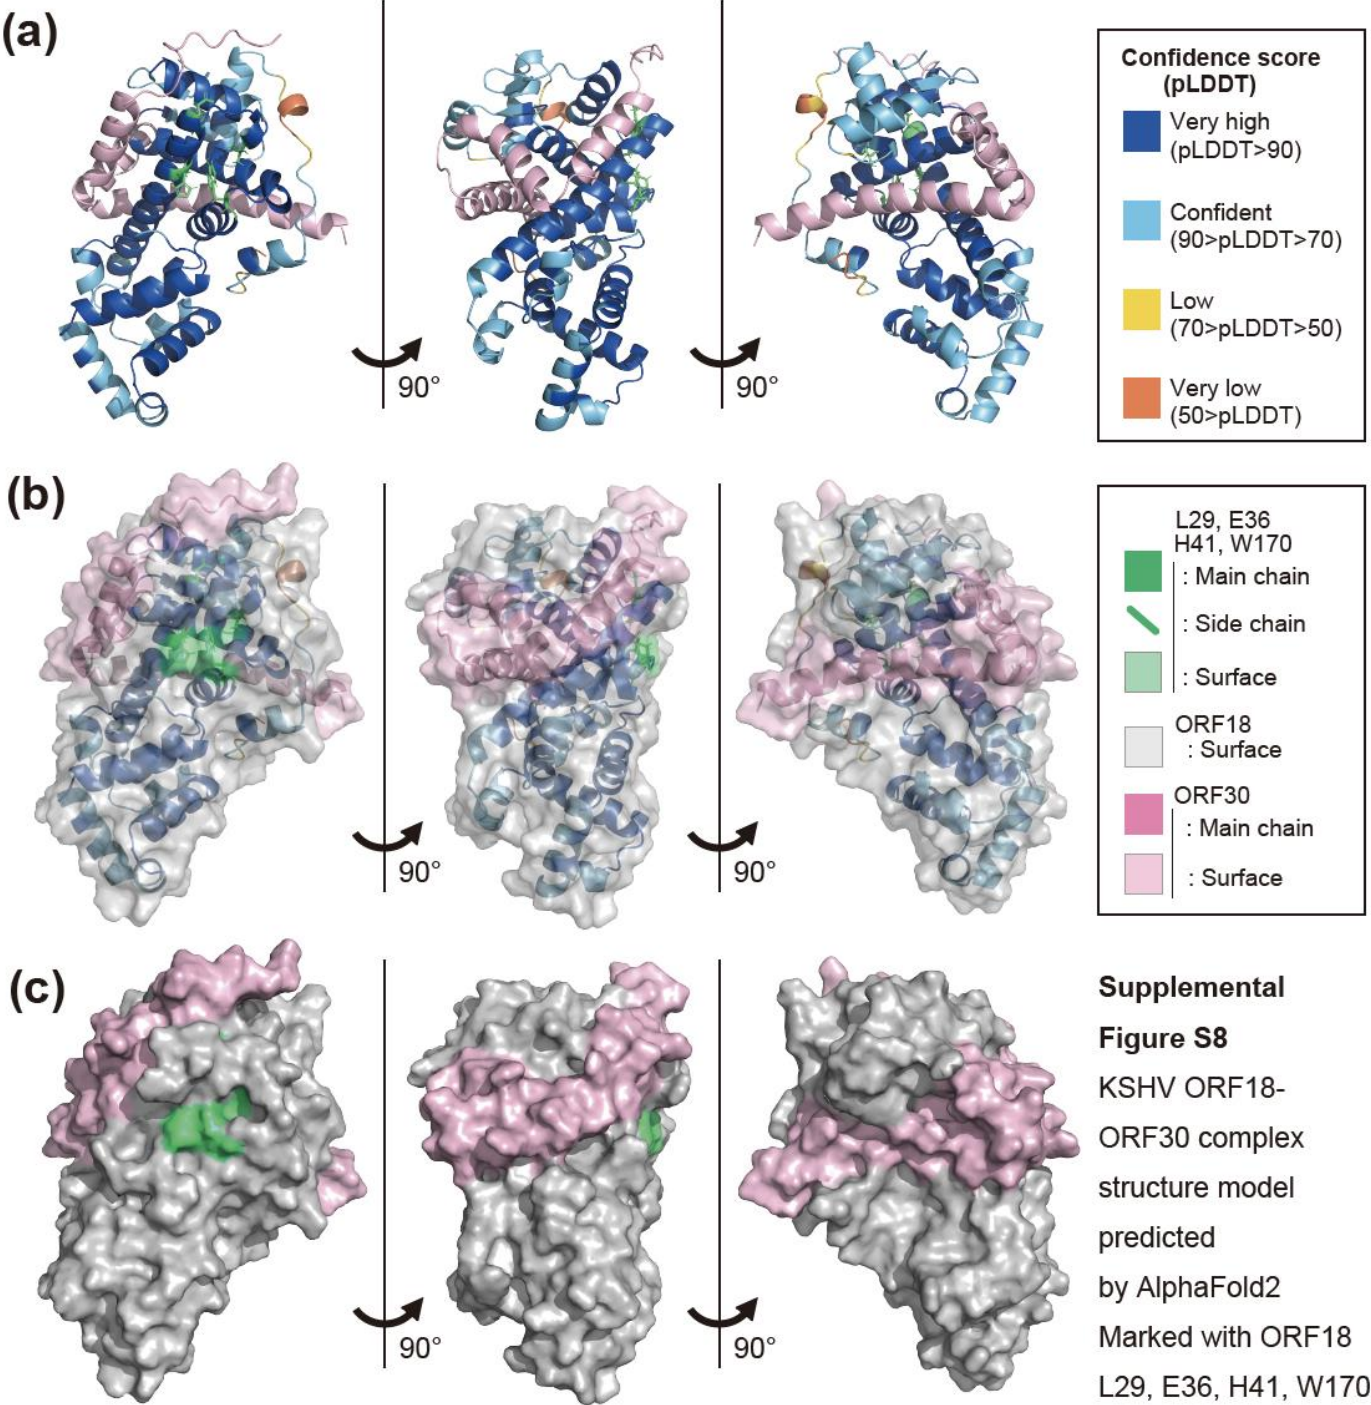



# Supplemental Figure S9

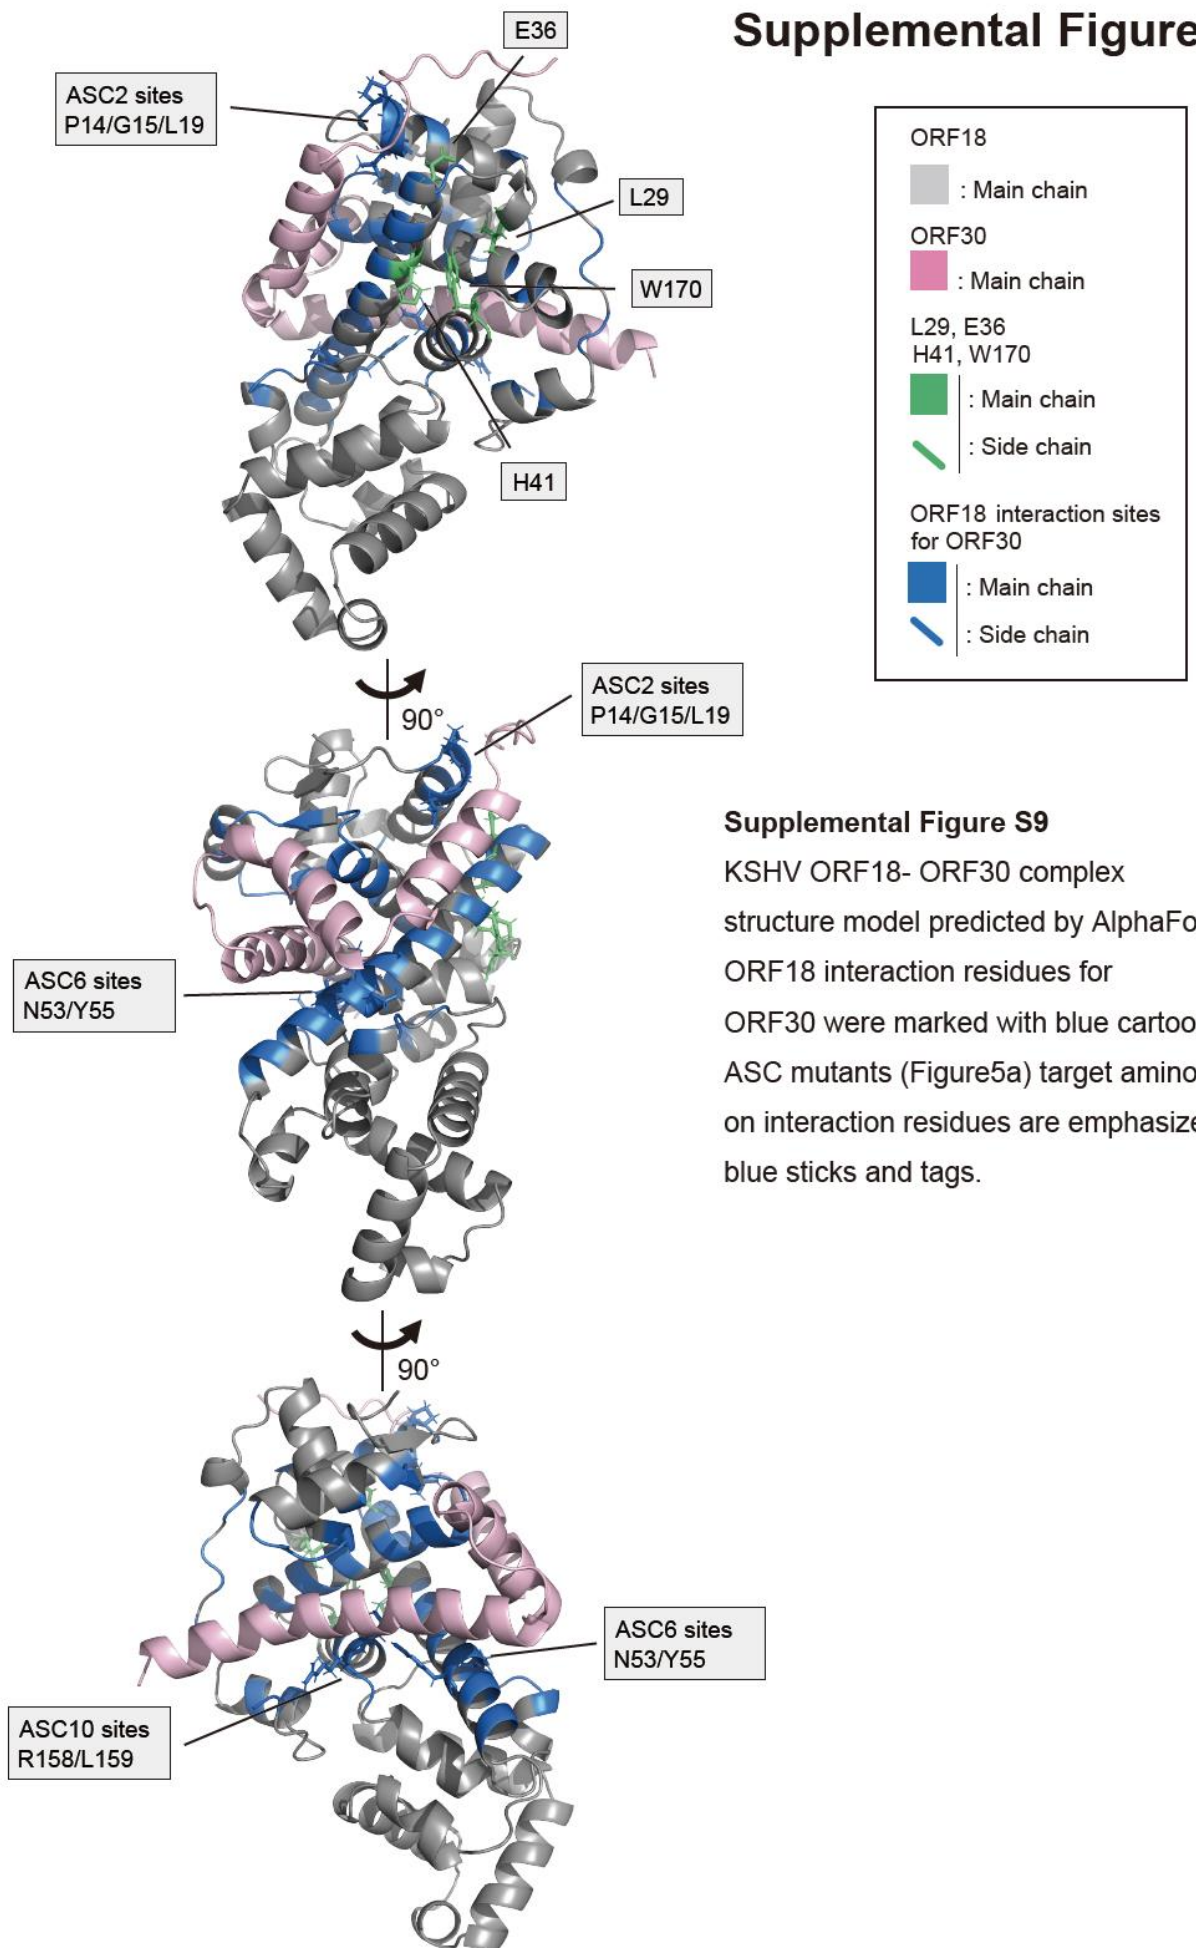

## Supplemental Figure S9

KSHV ORF18- ORF30 complex  
structure model predicted by AlphaFold2;  
ORF18 interaction residues for  
ORF30 were marked with blue cartoon.  
ASC mutants (Figure5a) target amino-acids  
on interaction residues are emphasized as  
blue sticks and tags.

# Supplemental Figure S10

(a)

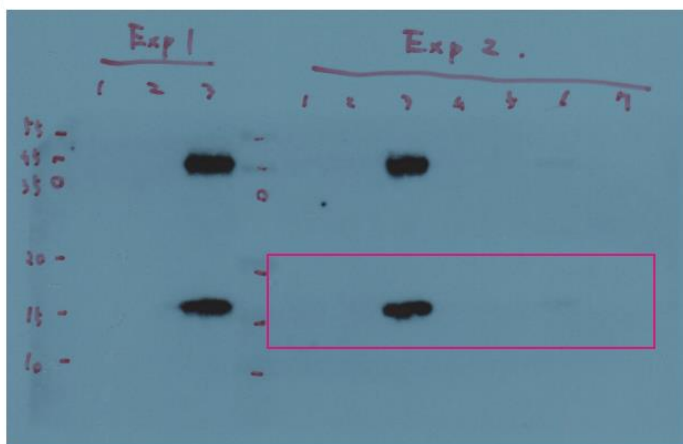

(b)

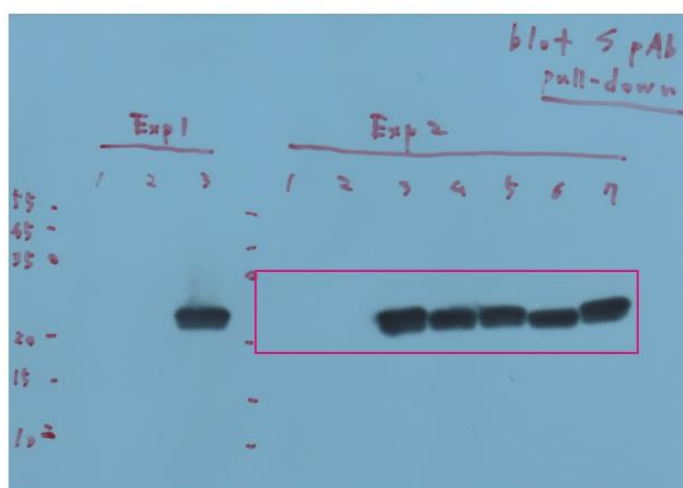

(c)

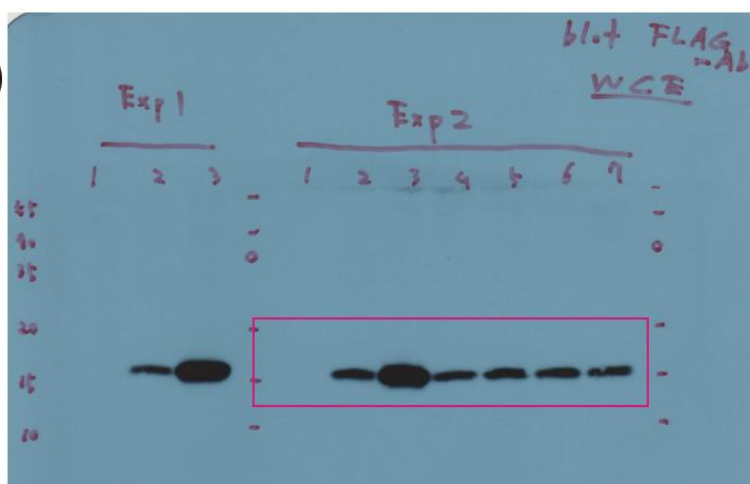

## Supplemental Figure S10

Original Western blotting data (X-ray film) of Figure 5b

(a) Original anti-FLAG blotting data of Figure 5b upper panel.

(b) Original anti-Stag blotting data of Figure 5b Middle panel.

(c) Original anti-FLAG blotting data of Figure 5b lower panel.

**Supplemental TABLE S1: Primers for construction of expression plasmids**

| Plasmid name                         | Primer name                                     | Primer sequences (5' -> 3')                                            |                        |
|--------------------------------------|-------------------------------------------------|------------------------------------------------------------------------|------------------------|
| <i>[VPK components]</i>              |                                                 |                                                                        |                        |
| ph-ORF18-mKGN                        | S2_EcoRI-kshvORF18                              | catcGAATTCgatgctcgaaatactggtgtagac                                     | <i>*a</i>              |
| ph-ORF18-mKGC                        | As(stp)_kshvORF18-NotI                          | taaGCGGCGCGTaaacgcggtgtgtttaaac                                        | <i>*a</i>              |
| ph-mKGN-ORF18                        | As2(Nstp)_kshvORF18-NotI                        | gttGCGGCGCGTaaacgcggtgtgtttaaac                                        | <i>*a</i>              |
| ph-mKGC-ORF18                        | As2(Nstp)_kshvORF18-NotI                        | atcGAATTCgatgggtgaacgactggatctcgac                                     | <i>*a</i>              |
| ph-ORF30-mKGN                        | S2_EcoRI-kshvORF30                              | tgagCGGCGCGTcaatttcgacacggtgtgtac                                      | <i>*a</i>              |
| ph-ORF30-mKGC                        | As(stp)_kshvORF30-NotI                          | aaaGCGGCGCGTcttcgcacggtgtgtac                                          | <i>*a</i>              |
| ph-mKGN-ORF30                        | As2(Nstp)_kshvORF30-NotI                        | catGGATCCatgacgcgcgcgcgcgcgcgc                                         | <i>*a</i>              |
| ph-mKGC-ORF30                        | S_BamHI-kshvORF24                               | ctaaAAGCTTTtagaccagcgcgcgcgcgcgc                                       | <i>*a</i>              |
| ph-ORF24-mKGN                        | As(stp)_kshvORF24-HindIII                       | gtcAAGCTTgaaccgcgcgcgcgcgcgcgc                                         | <i>*a</i>              |
| ph-mKGN-ORF24                        | As2(Nstp)_kshvORF24-HindIII                     | catcGAATTCgatgcacaaacagaaagactctgc                                     | <i>*a</i>              |
| ph-ORF31-mKGN                        | S2_EcoRI-kshvORF31                              | tagGCGGCGCGTctacgtatctcttctgtagacgt                                    | <i>*a</i>              |
| ph-ORF31-mKGC                        | As(stp)_kshvORF31-NotI                          | acgGCGGCGCGTctacgtatctcttctgtagacgt                                    | <i>*a</i>              |
| ph-mKGN-ORF31                        | As2(Nstp)_kshvORF31-NotI                        | catcCTCGAGaatgttctgttgtagctgcgc                                        | <i>*a</i>              |
| ph-ORF34-mKGN                        | S_XhoI-kshvORF34                                | ctaaAAGCTTTtagagttggttgatctctcc                                        | <i>*a</i>              |
| ph-ORF34-mKGC                        | As(stp)_kshvORF34-HindIII                       | actcAAGCTTtaggttggttgatctctcc                                          | <i>*a</i>              |
| ph-mKGN-ORF34                        | As2(Nstp)_kshvORF34-HindIII                     | catcCTCGAGaatgttctgttgtagctgcgc                                        | <i>*a</i>              |
| ph-ORF66-mKGN                        | S_XhoI-kshvORF66                                | ctgaAAGCTTTcaggaggaacactccgcacag                                       | <i>*a</i>              |
| ph-ORF66-mKGC                        | As(stp)_kshvORF66-HindIII                       | ctccAAGCTTtgaaggaacactccgcacag                                         | <i>*a</i>              |
| ph-mKGN-ORF66                        | As2(Nstp)_kshvORF66-HindIII                     |                                                                        |                        |
| <i>[Expression control plasmids]</i> |                                                 |                                                                        |                        |
| pCIneo-mCherry                       | S_EcoRI_mCherry<br>As(stp)_mCherry_Sall         | catcGAATTCgatgtagcaaggcgag<br>tagGTCGACtactgtacagctgctcatg             | <i>*a</i><br><i>*a</i> |
| <i>[ORF18 single mutants]</i>        |                                                 |                                                                        |                        |
| ph-mKGN-ORF18-P14A                   | S_1_KSHV_ORF18_P14A<br>As_1_KSHV_ORF18_P14A     | ccgctgagcGcAGggcttagagagctcatg<br>ctaaagccTGCgtacgcgcgtgcgtctc         | <i>*b</i><br><i>*b</i> |
| ph-mKGN-ORF18-G15A                   | S_2_KSHV_ORF18_G15A<br>As_2_KSHV_ORF18_G15A     | ctgagccgcGCGcttagagagctcatggtg<br>ctctcaagCGCcggtgcgcgcgcgcgcgc        | <i>*b</i><br><i>*b</i> |
| ph-mKGN-ORF18-L19A                   | S_3_KSHV_ORF18_L19A<br>As_3_KSHV_ORF18_L19A     | gcttagagagcGCcatgtggtgcttttgcacaaatag<br>gccacatGGCctctctaaagccccgcgtc | <i>*b</i><br><i>*b</i> |
| ph-mKGN-ORF18-L24A                   | S_4_KSHV_ORF18_L24A<br>As_4_KSHV_ORF18_L24A     | gtggcgcttTGCAaaataagtaatttaataac<br>cttattingTGCaaagcgccacatgagctc     | <i>*b</i><br><i>*b</i> |
| ph-mKGN-ORF18-L29A                   | S_5_KSHV_ORF18_L29A<br>As_5_KSHV_ORF18_L29A     | gaatGCAaatacaattccacgccaag<br>cgtggaatgattTGCattctattttgcacaaaag       | <i>*b</i><br><i>*b</i> |
| ph-mKGN-ORF18-E36A                   | S_6_KSHV_ORF18_E36A<br>As_6_KSHV_ORF18_E36A     | catccacgcacaaGCActgcgtttttattcaattg<br>cagTGcttgggcgtggaatgattttaattc  | <i>*b</i><br><i>*b</i> |
| ph-mKGN-ORF18-L37A                   | S_7_KSHV_ORF18_L37A<br>As_7_KSHV_ORF18_L37A     | ccaagagGCCcggttttattcatttggttc<br>gaataaaacGGCctcttgcgcgfggaatg        | <i>*b</i><br><i>*b</i> |
| ph-mKGN-ORF18-R38A                   | S_8_KSHV_ORF18_R38A<br>As_8_KSHV_ORF18_R38A     | caagaagctGCTtttattcatttggtctc<br>gaataaaAGCcaagctctggtggaatg           | <i>*b</i><br><i>*b</i> |
| ph-mKGN-ORF18-H41A                   | S_9_KSHV_ORF18_H41A<br>As_9_KSHV_ORF18_H41A     | gtttttatGCAttggtctctgcagagatg<br>gagaaccaaTGcaataaaacagcagctctg        | <i>*b</i><br><i>*b</i> |
| ph-mKGN-ORF18-L44A                   | S_10_KSHV_ORF18_L44A<br>As_10_KSHV_ORF18_L44A   | catttggttGCCgcagagatgacaaatttc<br>catctcgcGCAcacaacaaatgaataaaacg      | <i>*b</i><br><i>*b</i> |
| ph-mKGN-ORF18-P156A                  | S_11_KSHV_ORF18_P156A<br>As_11_KSHV_ORF18_P156A | gtggtgcGCAgcagagctgctctgtgag<br>cagctgcGTCgagcacactcccaatgattaaac      | <i>*b</i><br><i>*b</i> |
| ph-mKGN-ORF18-R158A                  | S_12_KSHV_ORF18_R158A<br>As_12_KSHV_ORF18_R158A | ccctgcGCTctgctctctggtgggcgcgc<br>cgcaaggagAGCgcaggggngcncacttcc        | <i>*b</i><br><i>*b</i> |
| ph-mKGN-ORF18-L159A                  | S_13_KSHV_ORF18_L159A<br>As_13_KSHV_ORF18_L159A | cctgcaggGCGctctctgagcgaggctac<br>cgcaaggagCGCctgcaggggngcncacttcc      | <i>*b</i><br><i>*b</i> |
| ph-mKGN-ORF18-C166A                  | S_14_KSHV_ORF18_C166A<br>As_14_KSHV_ORF18_C166A | ggctacGCActgccttttggggcagcgc<br>caaaaaggcagTGCgtagccgcgcgcgaaggag      | <i>*b</i><br><i>*b</i> |
| ph-mKGN-ORF18-L167A                  | S_15_KSHV_ORF18_L167A<br>As_15_KSHV_ORF18_L167A | ggctactgcGCTgcttttggggcagcgatg<br>caaaaaggcAGCgcagttagccgcgcgcgaag     | <i>*b</i><br><i>*b</i> |
| ph-mKGN-ORF18-W170A                  | S_16_KSHV_ORF18_W170A<br>As_16_KSHV_ORF18_W170A | cgctcttGCAggcagcagatgaacacgaac<br>catcgtgcGTCaaaggcggagcagtagcc        | <i>*b</i><br><i>*b</i> |
| ph-mKGN-ORF18-G171A                  | S_17_KSHV_ORF18_G171A<br>As_17_KSHV_ORF18_G171A | cgctcttttggGCAgcagatgaacacgaacg<br>catcgtGGCcaaaaggcggagcagtag         | <i>*b</i><br><i>*b</i> |

| Plasmid name                                          | Primer name                         | Primer sequences (5' -> 3')                                        |                        |
|-------------------------------------------------------|-------------------------------------|--------------------------------------------------------------------|------------------------|
| <i>[ORF18 ASC mutants]</i>                            |                                     |                                                                    |                        |
| ph-mKGN-ORF18_ASC1                                    | S mm1 EcoRI KSHV_ORF18              | catcgaattcgatgctcGCAaaatacgtgtgtagac                               | <i>*c</i>              |
| ph-mKGN-ORF18_ASC2                                    | S mm2 KSHV_ORF18                    | CAGCGcttagagagGCGCatggtgcgttttgca                                  | <i>*b</i>              |
|                                                       | As mm2 KSHV_ORF18                   | ctctcaagCGCTGcgtacggcgtcgtgctc                                     | <i>*b</i>              |
| ph-mKGN-ORF18_ASC3                                    | S mm3 KSHV_ORF18                    | GCAaaataagaatGCAaatacaattcagcccaag                                 | <i>*b</i>              |
|                                                       | As mm3 KSHV_ORF18                   | TGCActctatttttTGCAaagcacaatgaagctc                                 | <i>*b</i>              |
| ph-mKGN-ORF18_ASC4                                    | S mm4 KSHV_ORF18                    | caaGCAGCGCTttattcattttgcttc                                        | <i>*b</i>              |
|                                                       | As mm4 KSHV_ORF18                   | ACGGCGTGCgttcgtggaatgtatttaattc                                    | <i>*b</i>              |
| ph-mKGN-ORF18_ASC5                                    | S mm5 KSHV_ORF18                    | GCAttggtGCTcgagagatgaacttc                                         | <i>*b</i>              |
|                                                       | As mm5 KSHV_ORF18                   | GGCAaccaaTGCaaataacgcagctcttgg                                     | <i>*b</i>              |
| ph-mKGN-ORF18_ASC6                                    | S mm6 KSHV_ORF18                    | GCTgtgGCCGCTtaaggaggactactgc                                       | <i>*b</i>              |
|                                                       | As mm6 KSHV_ORF18                   | CGCGGCGcaAGCtagaccgaattgtacatc                                     | <i>*b</i>              |
| ph-mKGN-ORF18_ASC7                                    | S mm7 KSHV_ORF18                    | GCAgtgGCTGCAGCGCTtttttaattctggg                                    | <i>*b</i>              |
|                                                       | As mm7 KSHV_ORF18                   | CAGCcaactGCTgttctggggcgatcgcg                                      | <i>*b</i>              |
| ph-mKGN-ORF18_ASC8                                    | S mm8 KSHV_ORF18                    | GCGGCAAGCTctgggaatgtgtctccc                                        | <i>*b</i>              |
|                                                       | As mm8 KSHV_ORF18                   | gAGCTGCCGCAaatttccgtcacacagg                                       | <i>*b</i>              |
| ph-mKGN-ORF18_ASC9                                    | S mm9 KSHV_ORF18                    | ggagacAGCTTGCAAGCattaaacaaaagttccg                                 | <i>*b</i>              |
|                                                       | As mm9 KSHV_ORF18                   | CAtgccGCTGctctctggtgcgggctac                                       | <i>*b</i>              |
| ph-mKGN-ORF18_ASC10                                   | S mm10 KSHV_ORF18                   | CGCAGGcaTGcGgcacacttccagatttaac                                    | <i>*b</i>              |
|                                                       | As mm10 KSHV_ORF18                  | AGGTGgagcacaacgggacgcgc                                            | <i>*b</i>              |
| ph-mKGN-ORF18_ASC11                                   | S mm11 KSHV_ORF18                   | CAGCTgecttGACAGCAgcagatgacacgaacg                                  | <i>*b</i>              |
|                                                       | As mm11 KSHV_ORF18                  | CaaagcgAGCTCGctagccgcgcgcagagag                                    | <i>*b</i>              |
| ph-mKGN-ORF18_ASC12                                   | S mm12 KSHV_ORF18                   | CAcgtgcagGCTGCTcttctgcgcagagcttttc                                 | <i>*b</i>              |
|                                                       | As mm12 KSHV_ORF18                  | GCcaagctGCTggttctcgtctcccaaaaag                                    | <i>*b</i>              |
| ph-mKGN-ORF18_ASC13                                   | S mm13 KSHV_ORF18                   | GCAattgtacGCGatagctcgggctgtttatg                                   | <i>*b</i>              |
|                                                       | As mm13 KSHV_ORF18                  | CGctagcaaaTGCAagctctgcgcgaagag                                     | <i>*b</i>              |
| ph-mKGN-ORF18_ASC14                                   | S mm14 KSHV_ORF18                   | ccGCAcgtGCTatgccaagaggtctctg                                       | <i>*b</i>              |
|                                                       | As mm14 KSHV_ORF18                  | AGCAcgtTGCggagactcagtgacaaatg                                      | <i>*b</i>              |
| <i>[ORF18 truncated mutants]</i>                      |                                     |                                                                    |                        |
| ph-mKGN-ORF18A1                                       | S EcoRI_d1_KSHV-ORF18               | gccacGAATTCgtggcgctttttcaaaatagaatttaataac                         | <i>*a</i>              |
| ph-mKGN-ORF18A2                                       | S_d2_KSHV-ORF18-2                   | GAGGCTCTATGcaattggttctcagaggttac                                   | <i>*d</i>              |
|                                                       | As_d2_KSHV-ORF18-2                  | gaacaaatgCATGAGGCTCTCTTAAGCCCC                                     | <i>*d</i>              |
| ph-mKGN-ORF18A3                                       | S_d3_KSHV-ORF18                     | GCTTTTATTCaagccaatgcgggagactac                                     | <i>*d</i>              |
|                                                       | As_d3_KSHV-ORF18                    | caattgcagGATAAAACGACAGCTCTTTGGGC                                   | <i>*d</i>              |
| ph-mKGN-ORF18A4                                       | S_d4_KSHV-ORF18                     | GTTAAAGGGAGGCTTgaaagctgtgtatgatgg                                  | <i>*d</i>              |
|                                                       | As_d4_KSHV-ORF18                    | cgagcttcaAGCCTCCCTTAACAGGTACAC                                     | <i>*d</i>              |
| ph-mKGN-ORF18A5                                       | S_d5_KSHV-ORF18                     | AGGTGgagcacaacgggacgcgc                                            | <i>*d</i>              |
|                                                       | As_d5_KSHV-ORF18                    | ggtagctcCACCTCCGACGGAACCTTG                                        | <i>*d</i>              |
| ph-mKGN-ORF18A6                                       | S_d6_KSHV-ORF18                     | GCTGCTGTGTggtgcgaattatctgttcaac                                    | <i>*d</i>              |
|                                                       | As_d6_KSHV-ORF18                    | gataaattgcagACACAGCAGCATCTCGCTG                                    | <i>*d</i>              |
| ph-mKGN-ORF18A7                                       | S_d7_KSHV-ORF18                     | CTTTGAGGGGCAacgtgtggaacgaacttttg                                   | <i>*d</i>              |
|                                                       | As_d7_KSHV-ORF18                    | caaggtGCCCCCTCAAGAGCCCCAC                                          | <i>*d</i>              |
| ph-mKGN-ORF18A8                                       | S_d8_KSHV-ORF18-2                   | CCCCGGAAActgcggcgctactg                                            | <i>*d</i>              |
|                                                       | As_d8_KSHV-ORF18-2                  | ccgcaagTTCCGGGGCGATGCGAAC                                          | <i>*d</i>              |
| ph-mKGN-ORF18A9                                       | S_d9_KSHV-ORF18                     | CAGAGTGCTCTcttctgcacaaagctttc                                      | <i>*d</i>              |
|                                                       | As_d9_KSHV-ORF18                    | gcgaagaagAGGACGCTGCAGGGGAG                                         | <i>*d</i>              |
| ph-mKGN-ORF18A10                                      | S_d10_KSHV-ORF18                    | CTGGGTGGCTAggtgtctgtatgttgggc                                      | <i>*d</i>              |
|                                                       | As_d10_KSHV-ORF18                   | cagaagactACGCCACCCAGCGCTTCGTG                                      | <i>*d</i>              |
| ph-mKGN-ORF18A11                                      | S_d11_KSHV-ORF18                    | CTTATGCCACAGcgcgaatccgcctcatgtac                                   | <i>*d</i>              |
|                                                       | As_d11_KSHV-ORF18                   | gatgtgcgGCTGTGGCATAAGACGCC                                         | <i>*d</i>              |
| ph-mKGN-ORF18A12                                      | S_d12_KSHV-ORF18                    | GCACTCTGTcgtgcgaagcgcgcgc                                          | <i>*d</i>              |
|                                                       | As_d12_KSHV-ORF18                   | cttcggagagACAGACTGGCTCCACCG                                        | <i>*d</i>              |
| ph-mKGN-ORF18A13                                      | As(stp)_NotI_d13_KSHV-ORF18         | taaGCGGCGCGTaaagcggaataacccg                                       | <i>*a</i>              |
| <i>[Sub-cloning into 2xS tag expression plasmids]</i> |                                     |                                                                    |                        |
| pCIneo-2xS-ORF18 WT/mut                               | S_EcoRI_ORF18<br>As_ORF18(stp)_MluI | catGAATTCatgcctggaataactggtgtggtg<br>taaACCGCTTaaacgcgtgtgtgttaaac | <i>*a</i><br><i>*a</i> |

*\*a* : Uppercase indicates restriction enzyme site

*\*b* : Uppercase indicates mutagenesis sites

*\*c* : Uppercase indicates mutagenesis sites, underlined lowercase indicates restriction enzyme site

*\*d* : Uppercase indicates N-terminal protein coding sequences, lowercase indicates C-terminal protein coding sequences
